# Supplementary material
Source: HighWire-hosted journal article supplement (https://www.life-science-alliance.org/content/5/12/e202201484/F12)

Figure 6

Scar

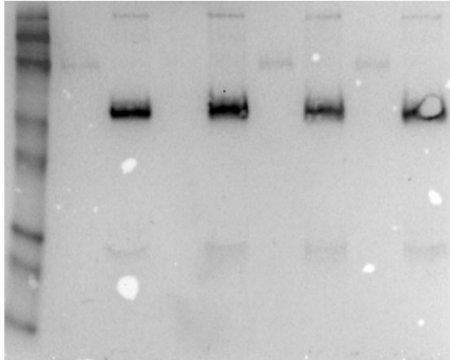

Dia

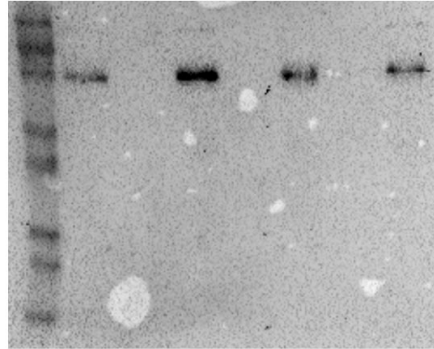

Actin

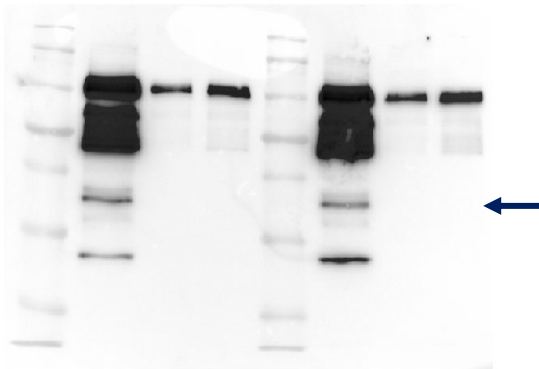

Profilin

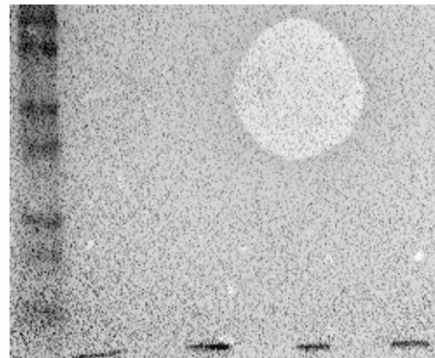

Suppl. Figure S6

# Scar

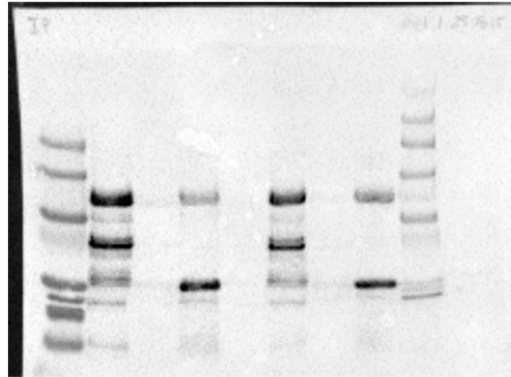

# HA

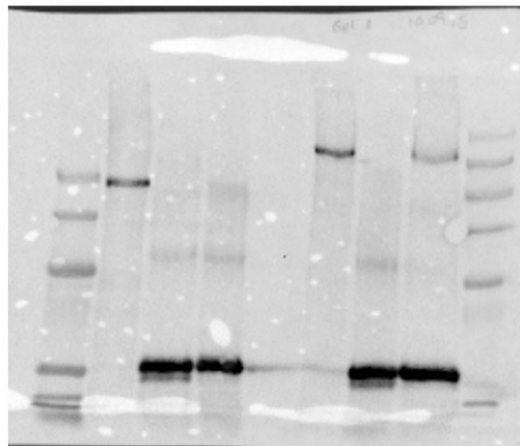

Supplement: inline-supplementary-material-2 [file inline-supplementary-material-2.pdf]
